# Supplementary material
Source: Springer Nature journal article supplement (https://mijn.bsl.nl/resource/supplementary/13047_2009_104_MOESM3_ESM.pdf/7109786)

**A**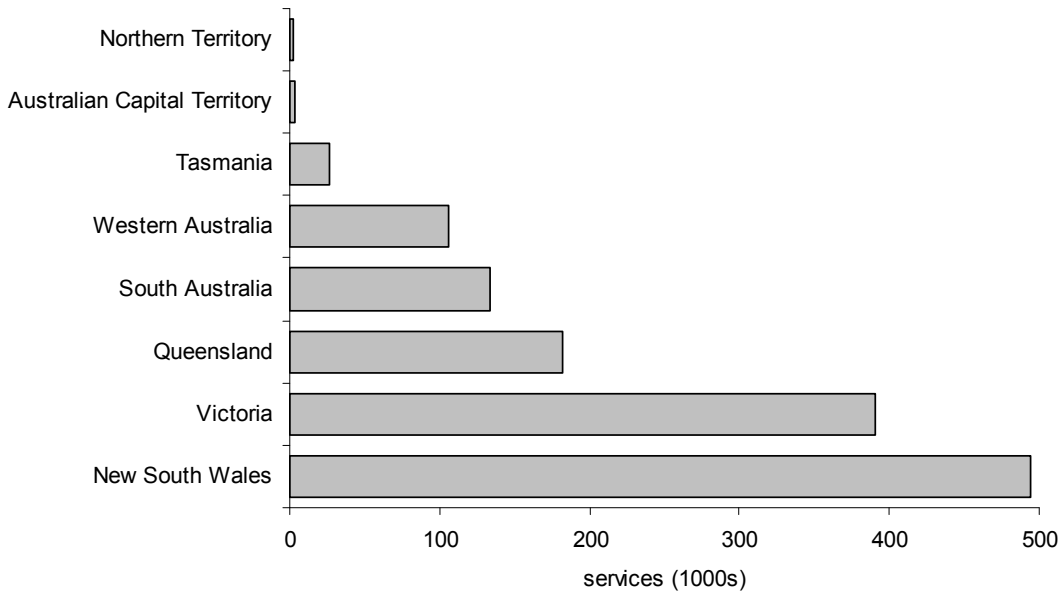**B**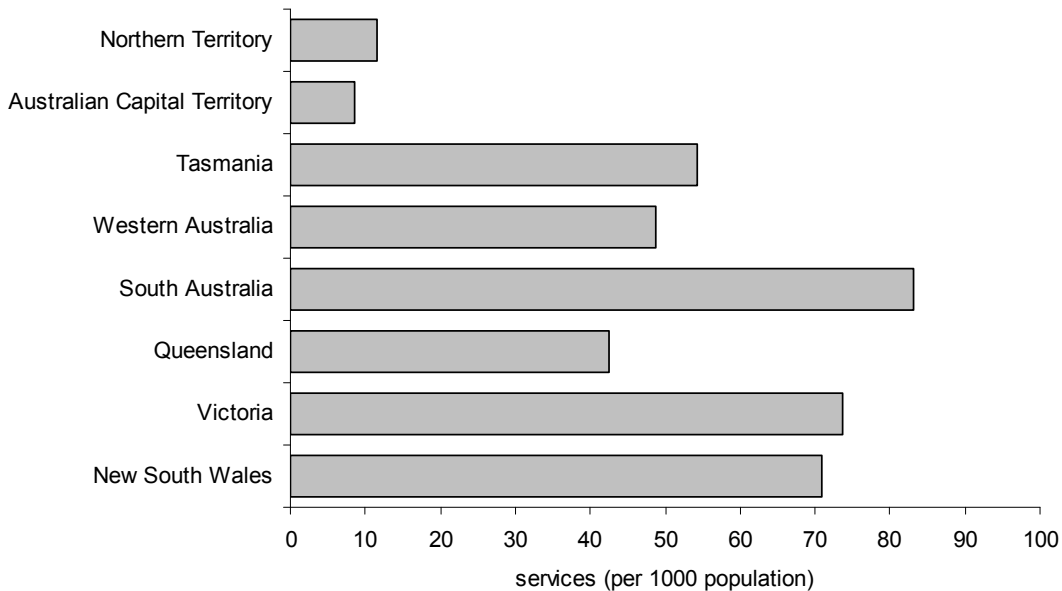

Supplement: MOESM3 [file 7109786]
